# Supplementary material
Source: PubMed Central journal article supplement (PMC3307880)
Supplement: NIHMS360087-supplement-1.pdf [file NIHMS360087-supplement-1.pdf]

## MATERIALS AND METHODS

### Database Searching and Cloning of CIP

We screened for novel cardiac-specific genes *in silico* by performing a BLAST search with ESTs from mouse embryonic heart cDNA libraries in the database as described previously<sup>1</sup>. One of the cDNA sequences identified in this screen (Access number AA919489) corresponded to the 3' untranslated region (3'-UTR) of the CIP transcript and was found in a cDNA library of E13.5 mouse embryonic hearts. This short cDNA fragment (273 nt) was used as a probe to screen a mouse embryonic heart cDNA library. Several cDNA clones were identified. Among them, the longest clone is 1336 nt in length. Polymerase chain reaction (PCR)-based cloning was further used to identify additional cDNA isoforms.

### CIP Reporter Mice

The CIP reporter line with a retroviral gene trap cassette inserted into mouse genome chromosome 9 (between chr9: 77,046,001 and 77,046,002) was generated and obtained from Texas A&M Institute for Genomic Medicine (TIGM). The gene trap cassette containing the selectable marker  $\beta$ -geo, a functional fusion between the  $\beta$ -galactosidase and neomycin resistance gene, was inserted into the putative third intron of the CIP gene (Online Figure III).

### *In Situ* Hybridization and Northern Analysis

Whole-mount and section *in situ* hybridization and Northern analyses were performed as described<sup>1,2</sup>. The 273 nt cDNA fragment corresponding to the 3'-UTR of the CIP gene was used as a probe to perform both whole-mount and tissue section *in situ* hybridization on staged mouse embryos.

For whole-mount *in situ* hybridization, E9.5 mouse embryos were dissected in PBS buffer and fixed in M buffer (100mM MOPS pH 7.4, 2mM EGTA, 1mM MgSO<sub>4</sub>, and 3.7% formaldehyde) at 4°C overnight. After bleaching in M buffer with 6% hydrogen peroxide for 48 hr at room temperature, embryos were dehydrated through an ascending methanol series in PBS (25, 50, 75 and 100% methanol) and stored in 100% methanol at -20°C until needed. Embryos were rehydrated through a descending methanol series in PBT (PBS plus 1% Tween 20) and PBT, permeabilized in PBT containing proteinase K (10 $\mu$ g/ml in PBT) for 30 minutes at room temperature. After post-fixing in 4% paraformaldehyde in PBT, embryos were washed three times in PBT, rinsed once each in 0.1M triethanolamine (pH 8) and in 0.1M triethanolamine plus acetic anhydride (2.5 $\mu$ l/ml). After incubation with prehybridization solution (0.3M NaCl, 20mM Tris pH 8.0, 1mM EDTA, 0.1M DTT, 1X Denharts, 10% dextran sulfate, 50% formamide, 250 $\mu$ g/ml yeast tRNA, and 100 $\mu$ g/ml salmon sperm DNA) for 2 hr at 60°C, embryos were hybridized with DIG-labeled riboprobes in hybridization solution (prehybridization solution plus 0.5-1 $\mu$ g/ml riboprobe) at 60°C overnight. After hybridization, embryos were washed two times (30 min each) with prehybridization solution at the hybridization temperature, followed by washing two times (30 min each)

with 50% formamide, 2X SSC at the same temperature. Embryos were then treated with RNase A (1 $\mu$ g/ml) and RNase T1 (1 unit/ml) for 30 min at 37°C. After a final wash with 0.2X SSC, 1% Tween 20 at 60°C, embryos were incubated with PBT plus 10% heat inactivated sheep serum (Sigma, St. Louis, MO) for 2 hr at room temperature and then with alkaline phosphatase conjugated Fab anti-DIG solution (1 to 2000 dilution in PBT plus 10% sheep serum) overnight at 4°C. Embryos were washed at least 8 times with PBT (1 hour each) and left in PBT overnight at 4°C to completely wash out excess amounts of alkaline phosphatase conjugated Fab. Color reaction was performed by washing embryos three times for 10 min each with buffer A containing 100 mM Tris pH 9.5, 50mM MgCl<sub>2</sub>, 100mM NaCl, 1% Tween 20, and 2mM levamisole, followed by incubating with detection solution (buffer A plus 4.5 $\mu$ l/ml nitroblue tetrazolium and 3.5 $\mu$ l/ml 5-bromo-4-chloro-3-indolyl-phosphate toluidinium) for various times at room temperature. When the color reaction was complete, embryos were washed twice with buffer A, once with PBT, and then post-fixed in 4% paraformaldehyde in PBT.

For Northern blot analysis, adult mouse multiple tissue northern blot purchased from Clontech (Palo Alto, CA) was used. A DNA probe containing 3'-UTR of the CIP gene was labeled with  $\alpha$ -<sup>32</sup>P-dATP using a random primed DNA labeling kit (Boehringer Mannheim, Indianapolis, IN). The hybridization was performed at 68°C for 1 hour in an ExpressHyb hybridization solution (Clontech, Palo Alto, CA). The filter was then washed twice in 2 $\times$ SSC, 0.05% SDS at room temperature for 30 minutes each, followed by 30 minutes at 50°C in 0.1 $\times$ SSC, 0.1% SDS. The filter was then exposed to X-ray film at -70°C with the presence of intensifying screens.

### **Constructs, Cell Culture, and Luciferase Reporter Assays**

Hela, COS7 and HEK293T cells were cultured in DMEM supplemented with 10% FBS in a 5% CO<sub>2</sub> atmosphere at 37°C. Luciferase reporter constructs fused with the MEF2C enhancer were as reported and is a generous gift of Dr. Brian Black (University of California, San Francisco)<sup>3</sup>. Transfections were performed with either FuGENE6 (Roche) or Lipofectamine (Invitrogen) reagents according to manufacturers instruction. Unless otherwise indicated, 100 ng of reporter plasmid and 100 ng of each activator plasmid were applied. 48 hours after transfection, cell extracts were prepared and luciferase activity was determined. For luciferase assay, normalized luciferase expression from triplicate samples in 12-well plates relative to LacZ expression was calculated, and the results are expressed as fold activation over the value relative to the control (Luciferase reporter and empty pcDNA). The CIP adenoviral expression construct (Ad-CIP) was constructed as previously described<sup>4</sup>. The CIP adenoviral expression construct (Ad-CIP) contained a cDNA encoding amino acids 1-309 of mouse CIP. Ad-CIP adenoviral constructs were N-terminal FLAG tagged.

### **Tissue Dissociation and Cell Sorting of Mouse Embryos**

E10.5 embryonic hearts were isolated by microdissection and dissociated to single cells by collagenase digestion as previously described<sup>5</sup>. Isolated cells were FACS sorted into GFP positive and GFP negative populations. Sorted cells were collected into Trizol

(Invitrogen) and frozen at -20°C for RNA isolation.

### **Immunocytochemistry and $\beta$ -Gal Staining**

Staged mouse embryos were dissected out, collected and fixed in 4% paraformaldehyde at 4°C for 4 hours. After washing in PBS, embryos were treated in 15% and 30% sucrose for 2 hours each and embedded in OCT. About 5–8  $\mu$ m cryostat sections were collected on positively charged slides. Sections were washed in PBS, blocked in 5% serum/PBS, and subjected to immunostaining. Antibody sources were as follows: GFP (Invitrogen); PECAM (BD Biosciences); Nkx2-5 (Santa Cruz); Wt1 (Santa Cruz); Cardiac Troponin T (Tnnt2) (generous gift of Dr. Jim Lin, University of Iowa); Cardiac Troponin I (Tnni3) (Santa Cruz); Actn2 (Sigma); Isl1 (DSHB, University of Iowa);  $\beta$ -galactosidase (MP Biomedical). Alexa-488 and 594 secondary antibodies (Invitrogen). Fluorescently stained slides were counterstained with DAPI and imaged with an FV1000 confocal microscope (Olympus). For  $\beta$ -gal staining, samples were stained with a solution containing 5 mM potassium ferricyanide, 5 mM potassium ferrocyanide, and 1 mg/ml X-gal substrate at 37°C for 12 hours after fixation.

### **Quantitative RT-PCR and Western blot analyses**

Total RNAs were isolated using Trizol Reagent (Invitrogen) from cells and tissue samples. For Quantitative RT-PCR, 2.0  $\mu$ g RNA samples were reverse-transcribed to cDNA by using random hexamers and MMLV reverse transcriptase (Invitrogen) in 20  $\mu$ l reaction system. In each analysis, 0.1  $\mu$ l cDNA pool was used for quantitative PCR. For Western blot analyses, cell extractions were cleared by 10,000 $\times$ g centrifugation for 10 min at 4°C. Samples were subsequently separated by SDS/PAGE and transferred to PVDF membranes that were incubated with 5% milk and Anti-FLAG (1:1,000, Sigma); Anti-Myc (1:1,000, Santa Cruz);  $\beta$ -tubulin (1:10,000, Sigma) overnight at 4°C and then washed three times with TBST buffer before adding secondary antibody. Polyclonal antibodies against the CIP protein were generated by immunizing rabbits with CIP proteins which were expressed and purified as GST-CIP fusion proteins in bacterial. Specific protein bands were visualized by using ECL (Invitrogen) reagents.

### **Coimmunoprecipitation Assays**

COS7 cells were transiently transfected with plasmids encoding FLAG-tagged CIP and Myc-tagged Isl1 proteins with FuGENE6 (Roche). Cells were harvested 48 h after transfection in lysis buffer composed of PBS containing 0.5% Triton X-100, 1 mM EDTA, 1 mM PMSF, and complete protease inhibitors (Roche). After a brief sonication and removal of cellular debris by 10,000 $\times$ g centrifugation for 10 min at 4°C, FLAG-tagged CIP proteins were precipitated with anti-FLAG antibodies and protein A/G beads and associated proteins analyzed by Western blotting with anti-Myc antibodies.

### ***In vitro* GST Protein-Binding Assays**

Plasmids encoding a GST fusion with CIP were transformed into BL21 plus cells

(Stratagene). The cells were grown at 37°C in 2×YT medium to an optical density of 1.0. Isopropyl-β-D-thiogalactopyranoside (50 μM) was then added to the culture to induce protein expression. After being shaken at room temperature for 4 h, the cells were harvested and the GST protein was purified with glutathione beads. Isl1 proteins translated *in vitro* were labeled with <sup>35</sup>S methionine by using a TNT T7 reticulocyte lysate system (Promega). Glutathione beads conjugated with GST fusion protein were incubated with 10 μl of TNT product at 4°C for 2 h in 500 μl of GST-binding buffer (20 mM Tris, pH 7.3/150 mM NaCl/0.5% Nonidet P-40/protease inhibitor/1 mM phenylmethylsulfonyl fluoride). The beads were washed three times with GST binding buffer. 50 μl of SDS loading buffer was then added to the beads. After boiling, 20 μl was loaded onto an SDS/PAGE gel and analyzed by autoradiography.

### **Cardiomyocyte Culture**

Neonatal rat cardiomyocytes were prepared as previously described<sup>4</sup>. Briefly, Neonatal rat cardiomyocytes were isolated by enzymatic disassociation of 1- to 2-day old neonatal rat hearts with the Neonatal Cardiomyocyte Isolation System (Worthington Biochemical Corp.). Cardiomyocytes were plated differentially for 2 hours to remove fibroblasts. Cells were plated on 1% gelatin-coated plates in medium containing 10% horse serum and 5% fetal calf serum (FCS). 18 hours after plating, cells were changed into serum-free medium and infected with adenovirus (Ad-LacZ for control and Ad-CIP) at a multiplicity of infection (m.o.i.) of 25. 24 hours later, cells were treated with hypertrophic agent, phenylephrine (PE), by changing to the PE-contained serum-free medium. Cells were harvested 24 hours after PE treatment for RNA isolation or 48 hours after PE treatment for immunochemistry.

### **REFERENCES:**

1. Wang D, Chang PS, Wang Z, Sutherland L, Richardson JA, Small E, Krieg PA, Olson EN. Activation of cardiac gene expression by myocardin, a transcriptional cofactor for serum response factor. *Cell*. 2001;105:851-862.
2. Wang DZ, Reiter RS, Lin JL, Wang Q, Williams HS, Krob SL, Schultheiss TM, Evans S, Lin JJ. Requirement of a novel gene, *Xin*, in cardiac morphogenesis. *Development*. 1999;126:1281-1294.
3. Dodou E, Verzi MP, Anderson JP, Xu SM, Black BL. *Mef2c* is a direct transcriptional target of *ISL1* and *GATA* factors in the anterior heart field during mouse embryonic development. *Development*. 2004;131:3931-3942.
4. Xing W, Zhang TC, Cao D, Wang Z, Antos CL, Li S, Wang Y, Olson EN, Wang DZ. Myocardin induces cardiomyocyte hypertrophy. *Circ Res*. 2006;98:1089-1097.
5. Zhou B, Ma Q, Rajagopal S, Wu SM, Domian I, Rivera-Feliciano J, Jiang D, von Gise A,

Ikeda S, Chien KR, Pu WT. Epicardial progenitors contribute to the cardiomyocyte lineage in the developing heart. *Nature*. 2008;454:109-113.

# Supplemental Material

## Online Figure I

|                   |         |     |      |     |
|-------------------|---------|-----|------|-----|
| QUERY             | PRAA    | RET | KY   | ANL |
| O43167/1-13       | KRKR    | RP  | KKV  | NTL |
| CPD1 DROME/1-13   | IKKR    | RP  | PAKN | KGS |
| O45912/1-13       | KKGR    | RP  | PAKN | PSA |
| CPD1 DROME 6/1-13 | TKGR    | RP  | PKSS | GGA |
| CAB40849 3/1-13   | SRGA    | RP  | PKA  | KSP |
| Q38778_1/1-13     | GRPR    | RP  | PKA  | KDP |
| AAC68776/1-13     | KKPR    | RP  | PKKY | EDS |
| O59212/1-13       | EKGR    | RP  | PKKY | STR |
| Q43877_1/1-13     | PRPR    | RP  | PKD  | PNA |
| ORC1 SCHPO/1-13   | SRGR    | RP  | PKY  | PLP |
| O15030 1/1-13     | ARAR    | RP  | PKT  | KPG |
| AAD21618_3/1-13   | KRGR    | RP  | PLH  | RSE |
| CAB42096 2/1-13   | KRRP    | RP  | RKH  | KPE |
| Q22173/1-13       | KKTR    | RP  | PKD  | RSQ |
| P92954/1-13       | KRGR    | RP  | PKQ  | KTQ |
| Q43877 3/1-13     | GRPR    | RP  | PKKI | ART |
| CPD1 DROME 1/1-13 | VKKR    | RP  | SKA  | SVG |
| O49276/1-13       | PRKR    | RP  | PKS  | MED |
| O49694 1/1-13     | KRNR    | RP  | PGS  | GGT |
| O49694/1-13       | KKKR    | RP  | PKY  | AAD |
| Q22381/1-13       | QKR     | RP  | PKT  | DA  |
| Q40725 12/1-13    | KRGA    | RP  | PKK  | RPL |
| AAD21618 6/1-13   | KRKR    | RP  | PLN  | KPK |
| Q40725_3/1-13     | GRGR    | RP  | PKK  | ASS |
| CPD1 DROME 9/1-13 | TKPR    | RP  | PAKN | IDD |
| P91155/1-13       | PRAR    | RP  | PKA  | TNL |
| O45912_7/1-13     | VLKR    | RP  | SVKQ | PKD |
| CPD1 DROME 8/1-13 | GRGL    | RP  | PKR  | AVE |
| O15030 2/1-13     | PKRR    | RP  | PSK  | FFK |
| O65795/1-13       | AKPR    | RP  | PKA  | AKT |
| Q50887/1-13       | PKKR    | RP  | PKA  | KTE |
| O49276 1/1-13     | GRAR    | RP  | PGV  | KNG |
| CPD1_DROME_2/1-13 | KRKA    | RP  | PKH  | QPS |
| O43095/1-13       | TRKR    | RP  | PKT  | IAS |
| O82964/1-13       | KRGR    | RP  | PKA  | HAM |
| Q06339/1-13       | AKKR    | RP  | PKS  | VVA |
| JH0797/1-13       | ARKR    | RP  | PKK  | IOL |
| CPD1 DROME 5/1-13 | PKKR    | RP  | PSLA | AGK |
| HMGC HUMAN 1/1-13 | KRPR    | RP  | PKW  | POQ |
| Q01086/1-13       | KRGR    | RP  | PKRS | VTD |
| AAC2 DICDI/1-13   | KRKR    | RP  | PKM  | DEE |
| O49276 2/1-13     | RKKR    | RP  | PKKF | DRI |
| P76546/1-13       | PKKR    | RP  | PKY  | NEK |
| O15026 1/1-13     | KRRR    | RP  | PKA  | RDL |
| Q40725 4/1-13     | KRGV    | RP  | PKN  | ATP |
| HMGC HUMAN 2/1-13 | KRPR    | RP  | PKGS | KNK |
| O23142 1/1-13     | EKKR    | RP  | PKGS | SSK |
| YN06 CAEEL/1-13   | KRRR    | RP  | PKD  | EEA |
| PRH PETCR/1-13    | KRSR    | RP  | PKV  | ONS |
| O00536 1/1-13     | TGKR    | RP  | RNT  | EKA |
| CPD1_DROME_7/1-13 | GGQR    | RP  | PKA  | SKI |
| Consensus/60%     | .+.RGRP | .Ks | .s.  |     |

Online Figure I. Sequence alignment between the putative AT\_hook DNA binding domain in CIP and other known AT\_hook DNA binding domain.

# Online Figure II

|           |                                                                                  |       |
|-----------|----------------------------------------------------------------------------------|-------|
| Human     | MELEKREK--RSL-----NKNLE-EKLTVSAGGSEAKPLIFTFVPTVRRPLPHTQLADTSKFLVKI---PEES        | 63    |
| Mouse     | MEFGKHEP--GSSLKR-----NKNLE-EGVTVSPGDPEAKPLIFTFVPTLRRPLPHTQLADTSKFLVKI---PEEP     | 65    |
| Rat       | MEFEKHEQ--GNALKK-----NEKLE-ERVTF-----                                            | 24    |
| Dog       | MEFEKHEK--GSL-----NKNLE-EKLTVSAGGSEAKPLIFTFVPTVRRPLPHTSKLADTSKFLVKI---PEEP       | 63    |
| Cow       | MDFEKHGK--GSL-----NENLE-EKLT-----                                                | 22    |
| Horse     | MEFEKHEK--GSL-----HKNLE-EKLTVSAGGSEAKPLIFTFVPTVRRPLPHTQLADTSKFLVKI---PEEP        | 63    |
| Opossum   | MEFERHGKDLGSSL-----ASNLL-TS-----                                                 | 21    |
| Chicken   | MELGKHESK--G-----RAALE-EKQMVTSQESEAKPLTFTFVPSIGQLPTHFEVVDVSKFLVIT---PEEP         | 61    |
| Xenopus   | MVLNKSSSEK--REVWADGSKHADSLTIRKQKISSIAPGTQPLNFTFIPITLGTLP SQVLVKGHDHNYTKVYVSCRKEE | 74    |
| Zebrafish | MALEQPHRTL-----G-KVTTVF-----ATKLKSFPPVFLKRLPAENRVRKVF-F-----                     | 44    |
|           | * : :                                                                            |       |
| Human     | SDK-SPETVNRSK-SNDYLT--NAGSQQERDQAKLTCPSEVSGTILQEREFEANKLQGMQSQDLFKAEYVIVDS       | 135   |
| Mouse     | TDK-SPETVNRFE-YSDHMTF--SSESKQERVQRILDYPSEVSGRNSQQKEFNTKEPQGMQKGDLFKAEYVIVDS      | 137   |
| Rat       | -----E-YSDHMTF--SCEskeERDQRILDYPSEVSGKNSQRKEFNTKEPQGMQKGDLFKAEYVIVDS             | 85    |
| Dog       | SDK-NPETVNRSE-SNEYLT--NAGSQPERNQGLIYPSEVSEKISQERGFKAELQGMQSQDLFKAEYVIVDS         | 135   |
| Cow       | -----D-SSEYFTL--NVGRQQRERGAALTCPSEAEDKASQGRESKEKPKQGMQSQDLFKAEYVIVDS             | 83    |
| Horse     | SDK-NPETVNRSN-SNEYLT--NAGSQQERDQGLTYPSEVSGKISQERGFKANEPQGMQSQDLFKAEYVIVDS        | 135   |
| Opossum   | -----NSNE-FLDCVTL--KSGIQEESDIQTYVCSTETSPKIQGRGLKLNQPEKMQSQDLFKAEYVIVDS           | 85    |
| Chicken   | KDLSNQEIKNKAVLSDELNL--NSGQQQDRVPAIST--DSTQTVLQSLV--SNSKGMQENDLFAEFILITDS         | 131   |
| Xenopus   | MSA-KPEGASVTEK-NKNTTSCIPASYDR-----SSAEELFPQQGVSASHTQDLQRNDFIAEFLVMDS             | 138   |
| Zebrafish | -----QTNR--A-KSSGEPGDCEKSMEEGVYKAEVVFQDA                                         | 78    |
|           | . . . : * : * :                                                                  |       |
| Human     | E-GEDEAASRK-VEQG-----PPGGIGTAAVRPKSLA SSSLVSDVVRPKTQGTDLKTSHPPEMLHGMAPQQ         | 200   |
| Mouse     | D-GEDEATCRQ-GEQG-----PPGGPGNIIATRPKSLA SSSLASDVVRPKVRGADLKTSSHPPIPHG APQQ        | 202   |
| Rat       | D-GEDEATCRQ-GEQG-----PPGATGNIATRPKSLA SSSLASDVVRPKVRGVDVYVSSHPPIPHG APQQ         | 150   |
| Dog       | E-GEDEATS GK-DEQG-----PPGGLGTASRPKSLA SSSLVSDVVRPKTRGTDLQAPSHSEMPHG APQQ         | 200   |
| Cow       | E-GEDEVPRGK-GDQG-----PPVGTGPPAARPA SSSLASDAVRPKTRGADLQAPSHPERPQAMASQQ            | 148   |
| Horse     | E-GEDEATSRK-SEQG-----PPGGMGTATRPKSLA SSSLSDVVRPKTRGTDLQAPSHPEMLGMAPQQ            | 200   |
| Opossum   | E-GEDEATGRK-EDKQ-----PTVGNHGLARPKSLALAPG ITLQKPHQ--GDFQGPQSDLPQDAASPQ            | 148   |
| Chicken   | G-DEDEAGAASINAQR-----PSNGFGPISAQL--LA--TSHVSPGMESRKPSPDGHLP--ATLHSTADQQ          | 192   |
| Xenopus   | DEGEDEVMNK-TNKALIFEESYKTSQAQLQVVEKPI-ASLSEVTVNEIC PEAQP-----NELSQDVNCEE          | 203   |
| Zebrafish | E-DGQIGEMRKN-T-----                                                              | 90    |
|           | . :                                                                              |       |
| Human     | KHGQQYKTKSSYKAFAAIPTNTLLLEQKALDEPAKT-ESVS---KDNTLEPPVELYFPAQLRQQTEELCATIDK       | 270   |
| Mouse     | KHG-----                                                                         | 205   |
| Rat       | KHGQQYKTKSSYKAFAAIPTNTLLLEQKALDEPART-ESNS---KASVSDLVPELCFPAQLRQQTEELCATIDK       | 220   |
| Dog       | KHGQQYKTKSSYKAFAAIPTNTLLLEQKALDEPAKT-EGVF---KDNALDLPELCFPAQLRQQTEELCATIDK        | 270   |
| Cow       | RHGQ-----ALDEPAKT-DSIS---KDSLDPPL-----                                           | 174   |
| Horse     | KHGQQYKTKSSYKAFAAIPTNTLLLEQKALDEPAKT-DSVF---KDKTLDPPLEFCSPAQLRQQTEELCATIDK       | 270   |
| Opossum   | KQI-----QALDEPKS-ERIT---KDSLDSHLE-----                                           | 174   |
| Chicken   | N-QQQYKIKTSYKAFAAIPTNTLLMEQKALEEPTKA-ADVT---EGSILDTHEMCPAQLRQQTEELCAVIDQ         | 261   |
| Xenopus   | KDLELYR KPNYKVFAAIPTNKLLLDQKALDEPETN-EENP--Q-FDETTETRESEVSPALLRQQTEEVCAVIDE      | 274   |
| Zebrafish | TQNETYKIKSTYKALAAIPTNTLLLEQQAIDEEVSKKEALLNPADNYSWEDPHAEMCSPAQLRQQTAELYATIDE      | 165   |
|           | . :                                                                              |       |
| Human     | VLQDSL SMHSSDSPSRSPK--TLLGSDTVK--TPTTLPRAAAGRETKYANLSSPSSTVSESQTKPGVIRPVVKS      | 341   |
| Mouse     | -----L--TPTTHPRAAAGRETKYANLSSSSSTASESQTTPGVI RPVVKVKS                            | 249   |
| Rat       | VLQDSL SMHSSDSPSRSPQ--TMLGSETIK--TPTTHPRAAAGRETKYANLSSSSSTSESQTKPGVIRPVVKS       | 291   |
| Dog       | VLQDSL SMHSSDSPSSAQ--TLLGSDMIK--MPTTLPRAAAGRETKYANLSSPSSTVSESQTKPGVIRPVVKS       | 341   |
| Cow       | -----MPTTLPRAAAGRETKYANLSSPSSTVPESQTKPGVIRPVVKS                                  | 217   |
| Horse     | VLQDSL SMHSSDSPSSSLQ--TLLGSDTIK--TPTTLPRAAAGRETKYANLSSPSSTVSESQTKPGVIRPVVKS      | 341   |
| Opossum   | -----MPVTVPRAAAGRETKYANLSPSSTMAVSQTKPGVIRPVVKS                                   | 217   |
| Chicken   | VLQDPLTMRCESSPSFLH--MNTESDVGK--VSTTLQRAAGRETRYANLYKSTPVVAESQMTKPGVIRPVVKS        | 332   |
| Xenopus   | VLHDPLPLHCDSSRSTKARWDSKRFNESSQ--MPKSSGSAGRETKYAFLLQSRKNAV DCQETKPGVIRPLASKV      | 347   |
| Zebrafish | VLEDTIQTRQSNHVNNAML--KSLAAEALRQQTSSPSFKLLGRETRYASSPFQPSVTTEKMTKPGVIRPVI TS       | 238   |
|           | ****.*                                                                           | ***** |
| Human     | RILLKKE-EEVYEPNPF SKYLEDNSDLFSEQDVT-----VPPKPVSLHPLYQTKLYPPAKSLLHPQ              | 401   |
| Mouse     | KLLLRKD-EEVYEPNPF SKYLEDNSGLFSEQAPD-----                                         | 282   |
| Rat       | KLFLKKE-EEVYEPNPF SKYLEDSSGLFSE-----                                             | 320   |
| Dog       | KILLKKE-EEVYEPNPF SKYLEDNSDFFSEQDVT-----VPPKPLSLHPLYQTRLCPAKSLLPPQ               | 401   |
| Cow       | KILLKKE-EEVYEPNPF SKYLEDNSDFFSEQDVP-----APPKPVSLHPLYQTRLHPPAKSLLRPQ              | 277   |
| Horse     | KILLKKE-EEIYEPNPF SKYLEDNSDLFSEQDVT-----VPHKPVSLHPLYQTRL YPPAKSLLHPQ             | 401   |
| Opossum   | KILLKKEEETIYEPNPF SKYLEDTSGLFAGQDVT-----SLHDATPLHPLYKTKFPFPAKSLLYPQ              | 278   |
| Chicken   | RIAQK-E-ELYQPNPFKYLEEISDQDVEQ-----P-----                                         | 362   |
| Xenopus   | TYTEKK-DD-DCSSNPF SHFTSSRTDFDARSK-----                                           | 378   |
| Zebrafish | RFTEdq-D-EEFHPNPFKILHGNKSNRYQKVFSGGLCAEAPADAPADSDPQPSERQEDYKSLA-----             | 301   |
|           | ***                                                                              |       |
|           | . :                                                                              |       |
| Human     | TLSHADCLAPGPF SHLS-FLSDEQENSHTLLSHNA-CNKL SHPMVA PEHEALDSK-----EQ                | 458   |
| Mouse     | -----HKLGI FS-----VKLGHPMVT PEHDTLDS-----KE                                      | 309   |
| Rat       | -----                                                                            | Q     |
| Dog       | TLsqADCLTPGPF SHLSSFLSDEQNSHTLFSGNT-YNKL SHPMVA PEHEALDSK-----EQ                 | 459   |
| Cow       | TRPHADGLTPGPF SHLSSFLSDEQNSHTLFSHNA-YN-----KQ                                    | 312   |
| Horse     | TLSHADCLTPGPF SHLSSFLSDEQNSHTLFSHNA-YNKL SHPMVA PEHEALDSK-----EQ                 | 459   |
| Opossum   | NLSYTDCLTPGPF SHLSSVSLGDGHVNSPTFSHNRLYN-----KV                                   | 319   |
| Chicken   | -----SHP VP PENETLSSKEVTNERGSV-----                                              | 387   |
| Xenopus   | -----KRTHQHTDL-----                                                              | 387   |
| Zebrafish | -----STQD-----VPSA-----VSTHETH-----                                              | 317   |

Online Figure II. Amino acid sequence alignment of CIP orthologs in multiple species. The AT hook DNA binding domain (in box) is highly conserved during evolution.

### Online Figure III

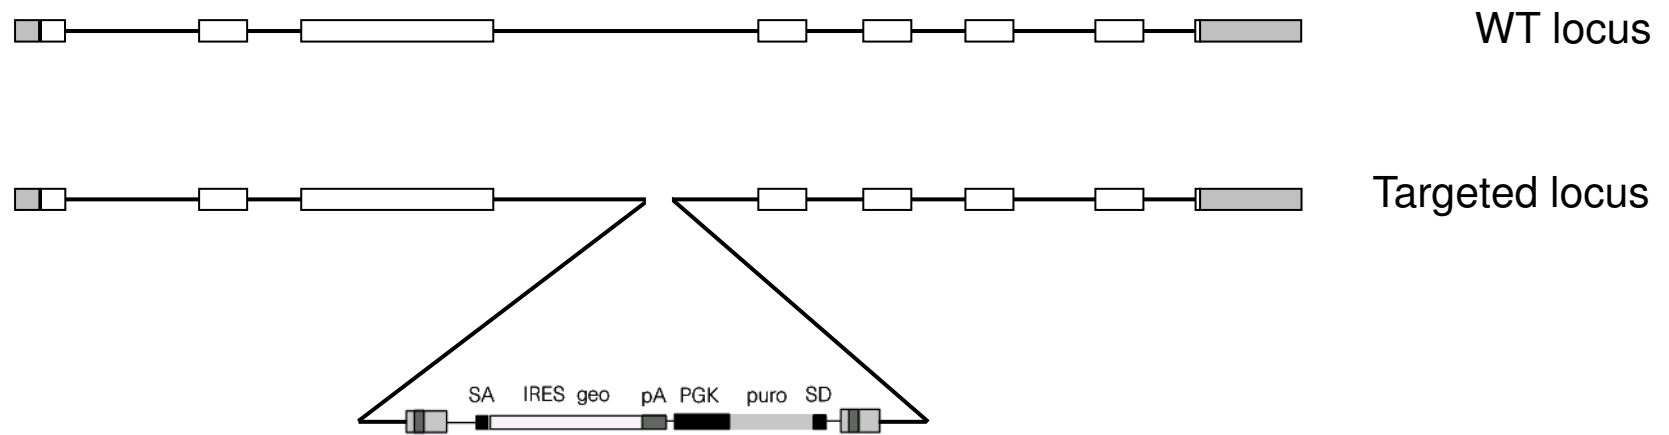

Online Figure III. Targeting strategy of CIP reporter line. The expression of  $\beta$ -gal-Neo (geo) fusion gene is driven by endogenous CIP promoter. An internal ribosome entry site (IRES) allows for translation initiation of  $\beta$ -gal-Neo fusion gene.



Online Figure IV

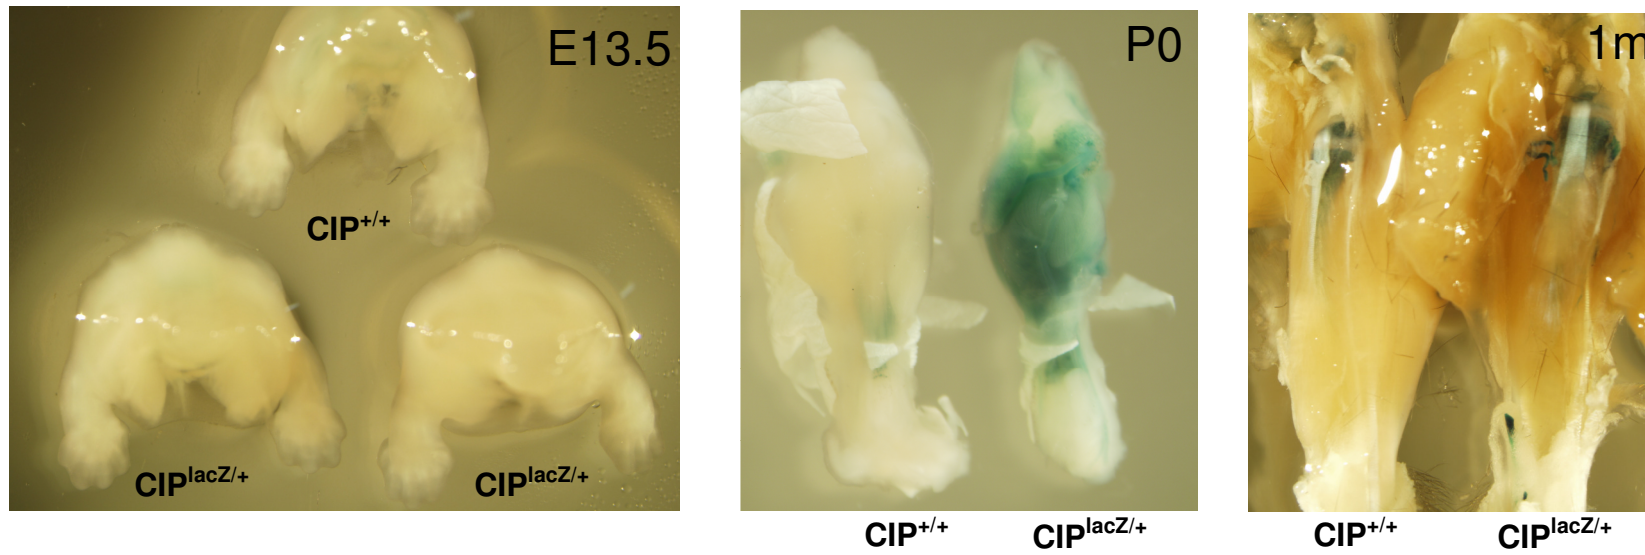

Online Figure IV.  $\beta$ -gal staining of forelimb/hindlimb in multiple stages of CIP reporter line showing the transient expression of CIP in skeletal muscle.
